# Supplementary material for: Combined friction force microscopy and quantum chemical investigation of the tribotronic response at the propylammonium nitrate–graphite interface
Source: Royal Society of Chemistry journal article supplement (doi:10.1039/c5cp01952d), 2015-01-01
Supplement: c5cp01952d1.pdf [file c5cp01952d1.pdf]

## Combined Friction Force Microscopy and Quantum Chemical Investigation of the Tribotronic Response at the Propylammonium Nitrate – Graphite Interface

Hua Li, Rob Atkin,\* Alister J. Page

*Newcastle Institute for Energy and Resources, The University of Newcastle, NSW  
2308, Callaghan, Australia.*

### Supporting Information

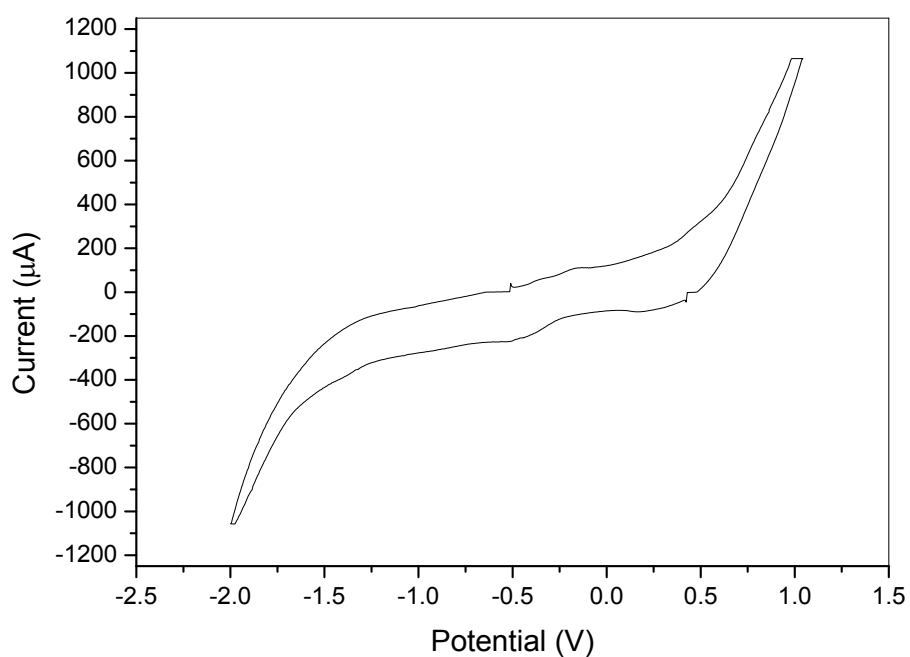

**Figure S1.** Cyclic voltammogram of PAN at 100 mV.s<sup>-1</sup>.

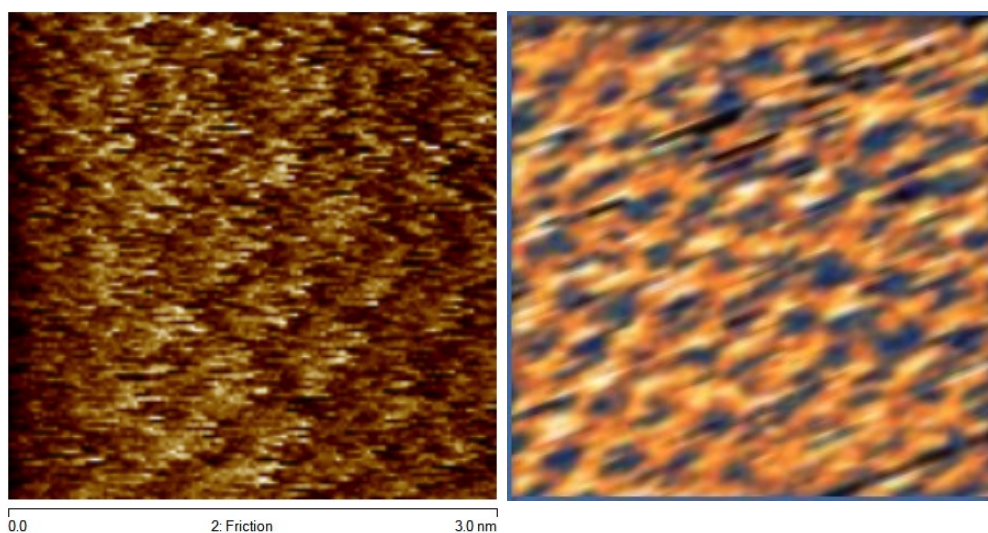

**Figure S2.** Lateral force image (forward) for the PAN-HOPG interface at 0 V obtained using FFM, and an amplitude modulated AFM image of the same system at the same scale, as described previously.<sup>1</sup> Note that while the features are less clear in the FFM image, the dimensions of the structures, and the rhomboidal symmetry, are consistent.

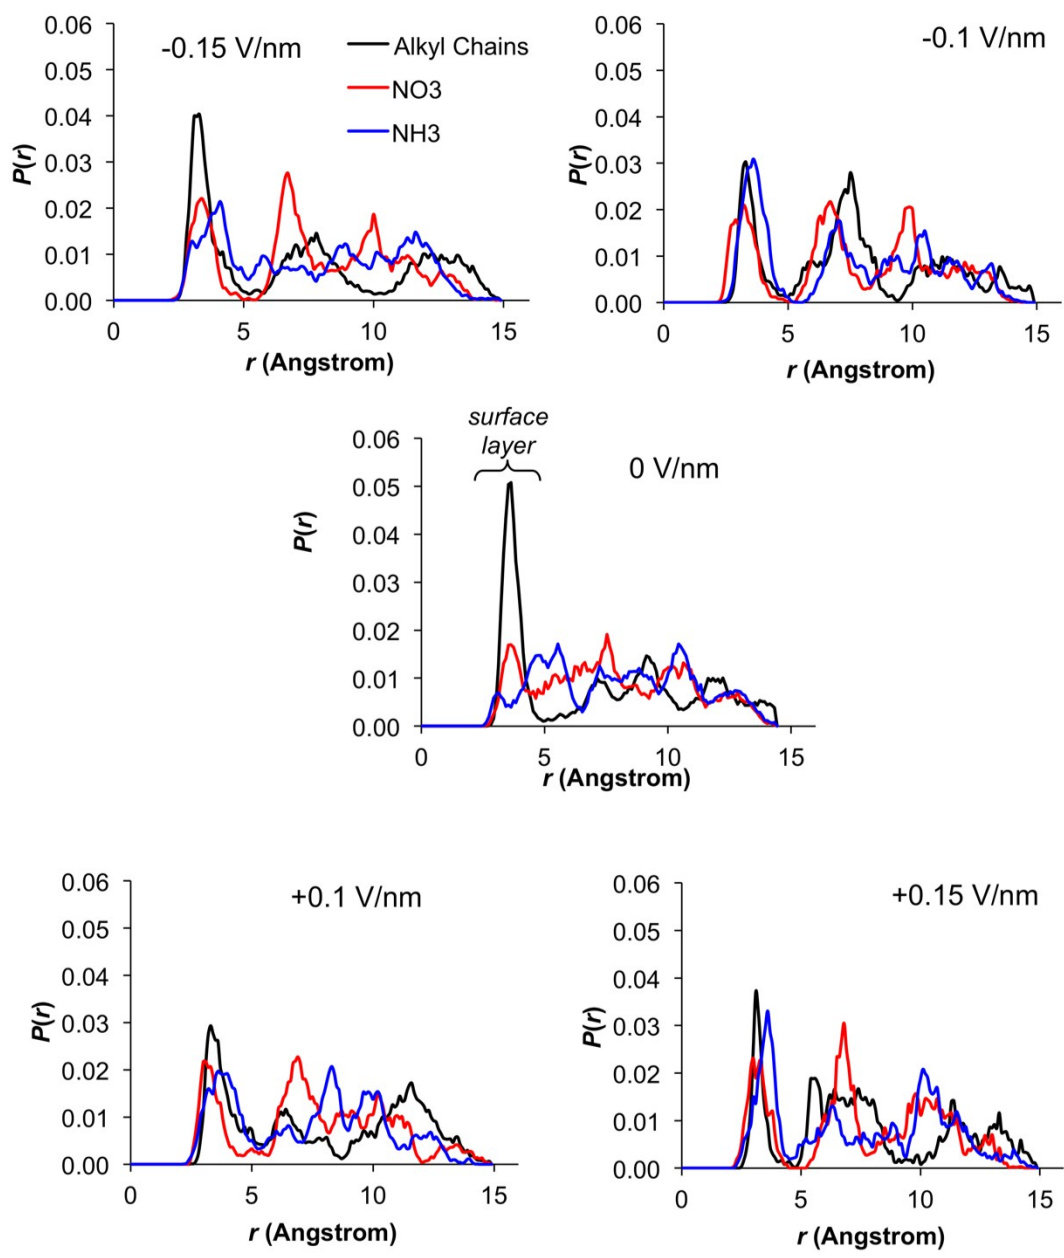

**Figure S3.** Simulated ion density profiles, normal to the HOPG surface, for the PAN-HOPG interface for applied fields between  $\pm 0.15$  V/nm. The surface layer consists of all ions within 5 Å from the HOPG surface. 0 V data is reproduced from reference.<sup>1</sup>

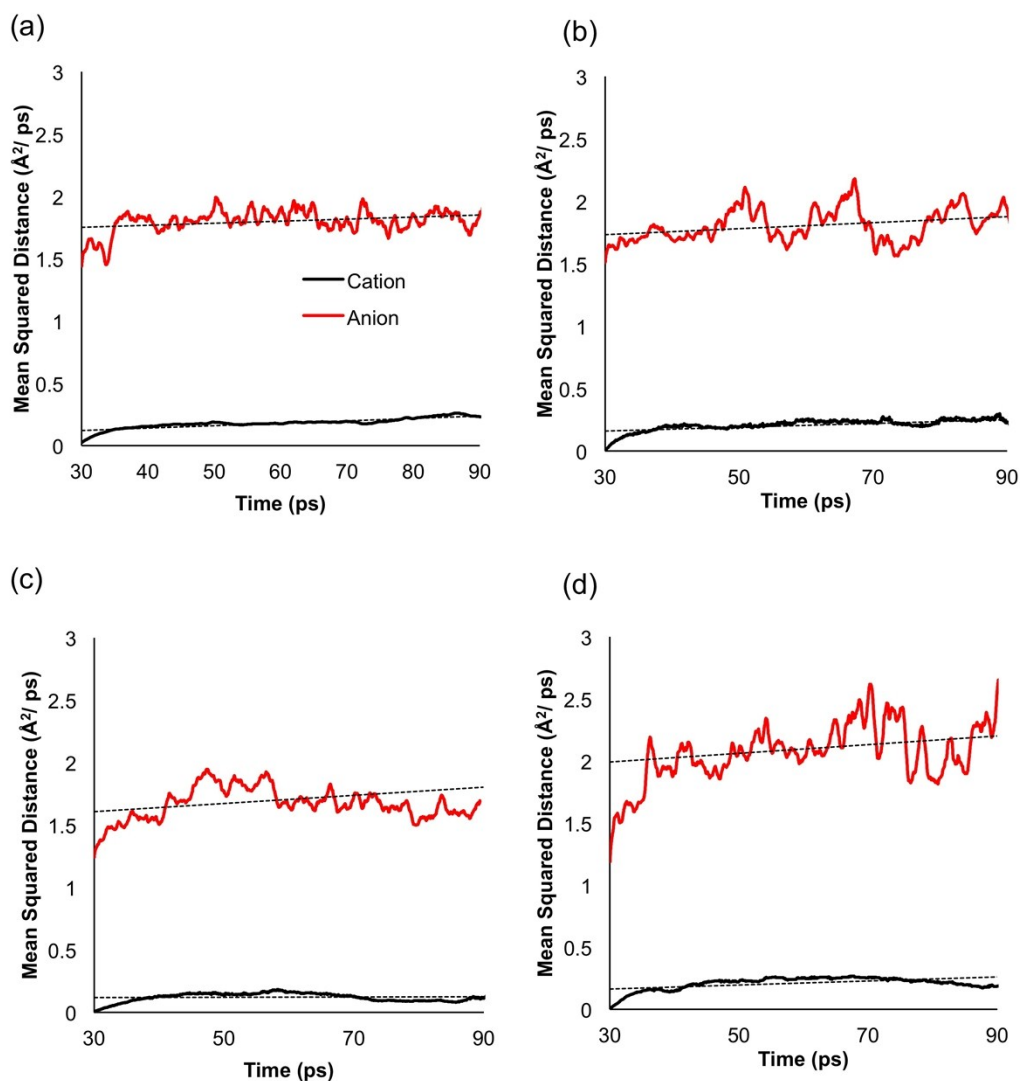

**Figure S4.** Mean squared displacement of cations and anions in the simulated PAN-HOPG interface at (a) -0.15 V (b) -0.1 V (c) +0.1 V and (d) +0.15 V. Linear regression gives diffusion coefficients ( $\times 10^{-1} \text{ m}^2/\text{s}$ ) of (a)  $4.35 \pm 0.49$  ( $\text{NO}_3^-$ ),  $0.93 \pm 0.01$  ( $\text{PA}^+$ ); (b)  $6.70 \pm 0.39$  ( $\text{NO}_3^-$ ),  $1.94 \pm 0.03$  ( $\text{PA}^+$ ); (c)  $15.32 \pm 1.43$  ( $\text{NO}_3^-$ ),  $2.84 \pm 0.06$  ( $\text{PA}^+$ ); (d)  $7.34 \pm 1.27$  ( $\text{NO}_3^-$ ),  $3.19 \pm 0.10$  ( $\text{PA}^+$ ).

## References

1. A. Page, A. Elbourne, M. Addicoat, G. Warr, K. Voitchovsky and R. Atkin, *Nanoscale*, 2014, **6**, 8100-8106.
